# Supplementary material
Source: MDPI journal article supplement (https://www.mdpi.com/2227-7102/13/6/597)
Supplement: s1 [file s1]

## Questionnaire 1: Primary School Questionnaire

My name is Brian and I am studying at Coventry University in the UK. This survey is for my project exploring the awareness of primary students on water resource management (lakes and rivers). In this survey, I am interested to know what you have learned, how you use and care for water resources. There is no right or wrong answer, I am interested to know what you think. Choose the answer that is the best for you, and you need to colour the box you have chosen. Use the space provided (**in case the space is not enough use the blank page at the end of the questionnaire**) for any other answer or any other elaboration you have.

**Confidentiality:** Please do not write your name on this form as I want everyone's name to be private. If you are unhappy and do not want to take part in this project, please let me know and you can stop at any stage.

**For example**

|                                                                                                      |
|------------------------------------------------------------------------------------------------------|
| Is it good to go to school?      Yes <input checked="" type="checkbox"/> No <input type="checkbox"/> |
|------------------------------------------------------------------------------------------------------|

### Demographics of pupils

1. I am a...

☐ Boy

☐ Girl

2. My age?

☐ 8   ☐ 9   ☐ 10   ☐ 11   ☐ 12   ☐ 13   ☐ 14 and above

3. I am in Primary...

☐ 1   ☐ 2   ☐ 3   ☐ 4   ☐ 5   ☐ 6   ☐ 7

4. Where do you live? (name of the place where you live with your family)

---

---

---

### Water awareness

5. All the following activities require water, please rate each activity by circling the number to determine how important these activities for water use (1- Less important and 5- Most importance).

Drinking      {Less important}   1   2   3   4   5   {Most important}

Swimming      {Less important}   1   2   3   4   5   {Most important}

Bathing      {Less important}   1   2   3   4   5   {Most important}

Cooking      {Less important}   1   2   3   4   5   {Most important}

Washing      {Less important}   1   2   3   4   5   {Most important}

6. Do you think water run out when we are not careful about how we use it at home and at school?

☐ Yes                              ☐ No                              ☐ I don't know

7. Among the people listed, who tells you that water is good for you? You can choose more than one.

☐ Parents  
☐ Friends  
☐ Teachers  
☐ Others, please provide your answer in the space below

---

---

---

8. Among the people listed, who tells you that water must be used carefully? You can choose more than one.

☐ Parents  
☐ Friends  
☐ Teachers  
☐ Television  
☐ Others, please provide your answer in the space below

---

---

---

9. Do you study about water at school?

☐ Yes                              ☐ No                              ☐ I don't know

10. If "Yes", which subject do you often learn about water? You can choose more than one

☐ Social studies (Literacy IIB)  
☐ Science (Literacy IA)  
☐ Others, please provide your answer below

---

---

---

11. What do you mainly study about water in the subject (s) chosen above?

- ☐ Importance of water
- ☐ How to keep water clean
- ☐ Sources of water (tap water, rainwater, boreholes among others)
- ☐ Others, please provide your answer in the space below

---

---

---

**Access and availability of water we use at home**

12. Where do you get water you use at home?

- ☐ From a tap
- ☐ From the boreholes
- ☐ From the water wells
- ☐ Others, please provide your answer in the space below

---

---

---

13. As a child, is fetching water one of the activities you do at home?

- ☐ Yes
- ☐ No

14. If “Yes”, please estimate how long it takes you to fetch water and return home?

- ☐ 0 minutes (water source is at home)
- ☐ 1-10 minutes
- ☐ 11-20 minutes
- ☐ 21-30 minutes
- ☐ 31-40 minutes
- ☐ 41-50 minutes
- ☐ 51-60 minutes
- ☐ 60 minutes and above

15. Have you ever had no water to use at home (shortage of water)?

- ☐ Yes
- ☐ No
- ☐ I don't know

16. How many times do you normally have no water at home?

- ☐ More than once a week > Regularly
- ☐ Once a week - Monthly > Once a week  
Twice a week
- ☐ More than Monthly>Three days a week

### How we use water at home

17. What do you do while brushing your teeth?

- ☐ Brush while water is running on a tap
- ☐ Turn off the tap while brushing
- ☐ Use a glass of water
- ☐ Others, please provide your answer in the space below

---

---

---

18. What do you do while bathing?

- ☐ Let the water run on a shower until you finish showering
- ☐ Turn off the shower when soaping
- ☐ Use a basin
- ☐ Other, please what do you use (please provide your answer in the space below)

---

---

---

19. How often do you wash your hands in a day?

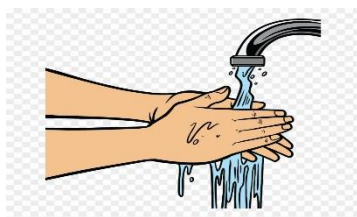

- ☐ Once a day
- ☐ Two times a day
- ☐ Three times or more in a day
- ☐ Never

20. How often do you turn off a tap after washing your hands?

- ☐ Every time
- ☐ Most of the time
- ☐ Rarely
- ☐ Never

21. Water collected from the rain is good to be used at home.

- ☐ Yes      ☐ No      ☐ I don't know

22. If "Yes", what is rain water used for at your home?

- ☐ For cooking  
☐ For cleaning the house  
☐ For washing clothes and dishes  
☐ Others, please provide your answer in the space below

---

---

---

### Healthy issues related to water

23. How many times do you play or walk-through unmoving water on the streets?

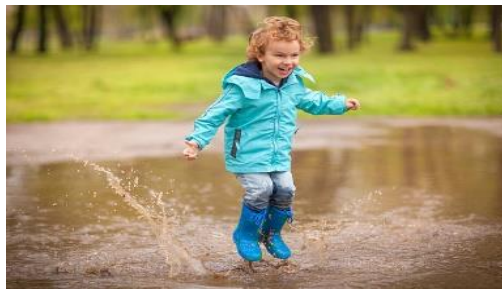

(Istockphotos, n.d)

- ☐ Every time      ☐ Most of the time      ☐ Rarely      ☐ Never

24. How often do you drink uncooked/un-boiled water?

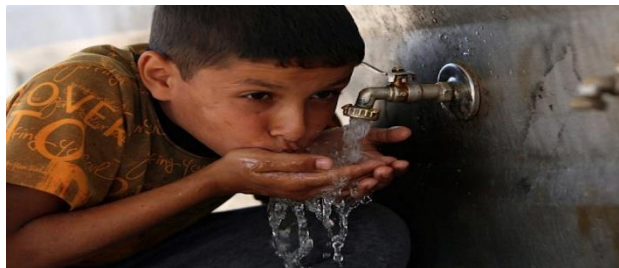

(Eran & Bromberg, 2014)

- ☐ Every time      ☐ Most of the time      ☐ Rarely      ☐ Never

25. Have ever got sick because of drinking uncooked water or playing in water?

- ☐ Yes      ☐ No      ☐ I don't know

## Pollution of water due to our activities.

**NOTE: Water pollution is the when water in rivers, oceans, lakes or any other source of water gets dirty and becomes harmful. This means you can no longer drink it, swim in it or use it for bathing (Primary leap, 2022).**

26. Where do you normally throw rubbish?

☐ Open rubbish area

☐ Trash bin

☐ None of the two

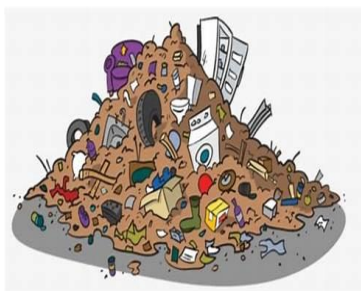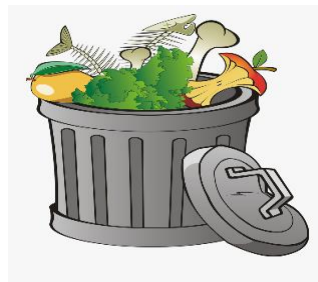

27. If none, then where do you throw your rubbish?

---

---

---

28. Have you ever thrown rubbish in running water (gullies)?

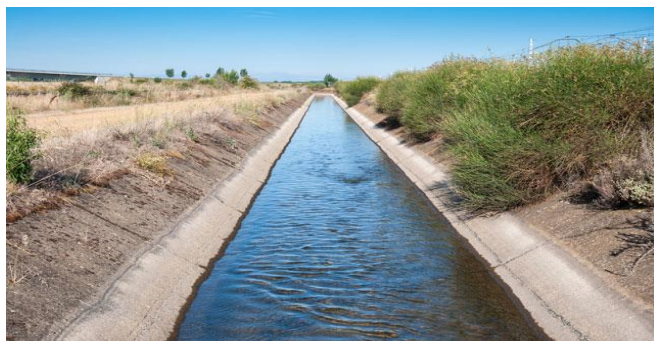

☐ Yes

☐ No

29. If yes, how often do you throw rubbish in running water (gullies)?

☐ Every time

☐ Most of the times

☐ Rarely

☐ Never

30. Have you ever urinated (okufuka) on a road side or in a playground?

☐ Yes

☐ No

31. If “Yes”, how often do you urinate on a road side?

- ☐ Every time I am lazy to go to the toilet
- ☐ Once a day.
- ☐ Two times a day.
- ☐ Three times a day.
- ☐ More than three times in a day.

**Note: For any additional information that could be useful for this project, please use the blank page at the back.**

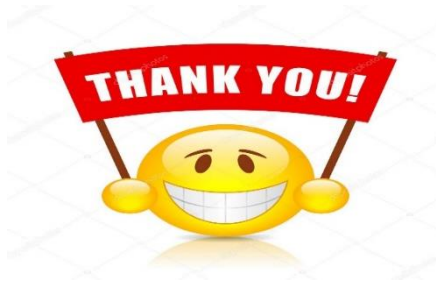

## Questionnaire 2: Secondary school Questionnaire

My name is Brian and I am studying at Coventry University in the UK. This survey is for my project exploring the awareness of secondary students on water resources management (lake and river). In this survey, I am interested to know what you have learned, how you use and care for water resources. There is no right or wrong answer, I am interested to know what you think. Choose the answer that is the best for you, and you need to circle the letter you have chosen. Use the space provided (**in case the space is not enough use the blank page at the end of the questionnaire**) for any other answer or any other elaboration you have. **Confidentiality:** Please do not write your name on this form as I want everyone's name to be private. If you are unhappy and do not want to take part in this project, please let me know and you can stop at any stage.

### Demographics of students

1. What is your gender?
  - a. Male
  - b. Female
2. What is your age group?
  - a. 14 and below
  - b. 15-16
  - c. 17-18
  - d. 19-20
  - e. 21-above
3. I am in secondary.....
  - a. S.1
  - b. S.2
  - c. S.3
  - d. S.4
  - e. S.5
  - f. S.6
4. Where do you live? (name of the place where you stay when you not at school)  

---

---

---
5. How many people live in your household?
  - a. 1-2
  - b. 3-4
  - c. 5-6
  - d. 7-8
  - e. 9-above

### Water awareness

6. All the following activities require water, please rate each activity by circling the number to determine how important these activities for water use (1- Less important and 5- Most importance).

|          |                  |   |   |   |   |   |                  |
|----------|------------------|---|---|---|---|---|------------------|
| Drinking | {Less important} | 1 | 2 | 3 | 4 | 5 | {Most important} |
| Swimming | {Less important} | 1 | 2 | 3 | 4 | 5 | {Most important} |
| Bathing  | {Less important} | 1 | 2 | 3 | 4 | 5 | {Most important} |



Cooking      {Less important}   1   2   3   4   5   {Most important}

Washing      {Less important}   1   2   3   4   5   {Most important}

7. Who most often tells you that water must be used carefully?

- a. Parents
- b. Friends
- c. Teachers
- d. Television advertises
- e. Others, please provide your answer in the space below

---

---

---

8. At school, which subject do you most often study about water?

- a. Biology
- b. Geography
- c. Others, please provide your answer in the space below

---

---

---

9. What do you mainly study about water at school?

- a. Importance of water
- b. Use of water =11d
- c. Polluting of water =11e
- d. All the above =11f
- e. Others, please provide your answer in the space below

---

---

---

10. On scale of 10, rate how interesting you find lessons about water.

|             |   |   |   |   |   |   |   |   |   |    |                 |
|-------------|---|---|---|---|---|---|---|---|---|----|-----------------|
| Interesting | 1 | 2 | 3 | 4 | 5 | 6 | 7 | 8 | 9 | 10 | Not Interesting |
|-------------|---|---|---|---|---|---|---|---|---|----|-----------------|

11. Have you ever come across a broken pipe?

- a. Yes
- b. No

12. What do you mainly do when you come across a broken pipe?

- a. Inform the local authorities
- b. Asked your parents to inform the authorities
- c. Just ignored
- d. Others, please provide your answer in the space below

---

---

13. How long did it take for a broken pipe to get fixed?

- a. One day
- b. Two days
- c. Three days
- d. More than three days
- e. Unsure

#### **Access of water at home**

14. Where do mainly access water you use at home?

- a. Tap water
- b. From the boreholes
- c. From water wells
- d. Other, please provide your answer in the space below

---

---

---

15. How long does it take you to get to the source of water?

- a. 0 minutes
- b. 1-10 minutes
- c. 11-20minutes
- d. 21-30minutes
- e. 31-40minutes
- f. 41-50minutes
- g. 51-60minutes
- h. 60 and above minutes
- i. Others, please provide your answer in the space below

---

---

---

16. Do you sometimes collect rainwater at home?

- a. Yes
- b. No

17. If “Yes”, what do you use it for?

- a. Cooking
- b. Cleaning
- c. Washing
- d. Others, please provide your answer in the space below

---



---



---

18. How often do you experience water shortage at home?

- a. Regularly
- b. Once a week day
- c. Twice a week
- d. Three days a week
- e. Never
- f. I don't know

### **Utilisation of water at home**

19. What type of toilets do you use at home?

- a. Pit latrines
- b. Flushing toilets
- c. Other, please provide your answer in the space below

---



---



---

20. What do you mainly use to wash clothes at home?

- a. Washing machines
- b. From a shower tap
- c. Using a basin
- d. Others, please provide your answer in the space below

---



---



---

21. While bathing, do you

- a. Let the water run until I finish showering
- b. Turn off the tap when soaping
- c. Use a basin
- d. Other, please provide your answer in the space below

---



---



---

22. How many times do you have a bath in a day?

- a. Once
  - b. Twice
  - c. Three times
  - d. Never
23. While brushing your teeth, do you
- a. Brush while water is running on a tap
  - b. Turn off the tap while brushing
  - c. Use a glass of water
  - d. Other, please provide your answer in the space below

---



---



---

24. How often do you wash clothes in a week? If your parents wash for you, you may select “Never”.

- a. Once
- b. Twice
- c. More than twice a week
- d. Never

### **Pollution of water**

25. Do you wash dishes at home?

- a. Yes
- b. No

26. If “Yes”, during the washing of dishes, where do you mainly pour the remaining or unwanted cooking oil?

- a. In the sink
- b. In running water
- c. In the compound
- d. Others, please provide the answer in the space below

---



---



---

27. Where do you mainly throw rubbish?

- a. Open rubbish area
- b. Trash bin
- c. Other\_\_\_\_\_

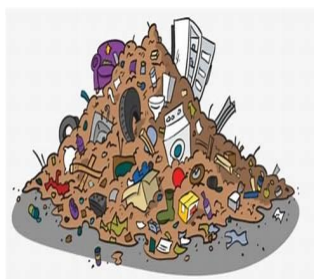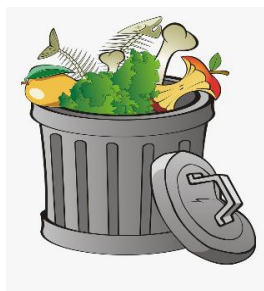

28. Have ever thrown away medicine given to you?

a. Yes

b. No

29. If “Yes”, where do you normally throw it? (You choose more than one)

a. Into moving water

b. Home compound

c. Nearby rubbish area

d. Others, please provide your answer in the space below

---

---

---

**A wide use of pharmaceuticals (medicine) and the widespread practices of their incorrect disposal measures have made these products contaminants of emerging concern. Worldwide, medicine particles have been detected in surface water and soil where they do affect the living systems.**

30. Are you aware of the consequences of throwing medicine to environment?

a. Yes

b. No

c. Unsure

31. If “Yes”, what are some of the consequences you are aware of?

---

---

---

**Note: If there is anything else you would like to add to this project, please use the remaining space of the paper.**

**THANK YOU FOR YOUR COOPERATION**

### Questionnaire 3: Teacher's Questionnaire

My name is Brian Nalumenya and I am a doctoral student at Coventry University. In this survey, I am interested to know the water activities you teach in schools, how you teach them and also the training you received about water activities from your training teaching institutes. After you completed answering the survey, I will come to you individually to collect the finished hardcopy of the questionnaire. Choose your best answer and circle, or fill your answer in the space provided, there is no right or wrong answer in the survey. Use the space provided **(in case the space is not enough use the blank page at the end of the questionnaire)** for any other answer or any other elaboration you have.

**Confidentiality:** All information provided will be anonymous and remain confidentiality. If you are unhappy and do not want to take part in this project, please let me know and you can stop at any stage. For any clarification about the questionnaire, please do not hesitate to contact me at (nalumenb@uni.coventry.ac.uk).

#### Demographics

1. Your gender
  - a. Male
  - b. Female
  - c. Other \_\_\_\_\_
2. Age group
  - a. 18-24
  - b. 25-34
  - c. 35-44
  - d. 45-54
  - e. 55-64
  - f. 65 and over
3. What level of education do you teach?
  - a. Primary level
  - b. Secondary level
4. If primary, what level of classes do you primarily teach?
  - a. Lower primary level
  - b. Upper primary level
5. If secondary, what level of classes do you primarily teach?
  - a. Lower secondary level
  - b. Upper secondary level

#### Water resource activities taught schools

6. Does the Uganda education curriculum include knowledge about water resources?
  - a. Yes
  - b. No
  - c. Unsure

7. If “Yes”, which subject mainly obtains activities about water resources?

- a. Science
- b. Social Studies
- c. Geography
- d. Biology
- e. Others, please provide your answer in the space below

---

---

---

8. Which activity is mainly taught about water in the subject you chose in question 6?

- a. Importance of water
- b. Water management
- c. Water Pollution
- d. Others, please provide your answer in the space below

---

---

---

9. What is the primary method used when teaching about the water activities to students?

- a. Through theoretical teaching
- b. Using presentation slides and workshops
- c. Through fieldworks
- d. Others, please provide your information in the space below

---

---

---

10. What is the main challenge involved in teaching water activities to students? You can choose more than one

- a. Access to materials to be used when teaching water activities
- b. Lack of funds for fieldwork
- c. Teacher’s knowledge and training
- d. Others, please provide your information in the space below

---

---

---

### **Training of teachers**

11. Did you obtain your teaching training from a teaching institute?

- a. Yes
- b. No

12. If “Yes”, where did you obtain your teaching training from?

---

---

---

13. When did you complete your teaching training?
- Less than 1 year ago
  - Between 1-3 years ago
  - Between 4-6 years ago
  - Between 7-9 years ago
  - 10 years and more
14. Environmental education is a method that permits individuals to explore environmental issues, involve in problem solving, and take action to improve the environment (EPA, 2021). During your training, was Environmental education among the mandatory programmes taught at your institution?
- Yes
  - No
15. If “Yes”, please **circle** all the topics which were covered and **tick** on those you liked most?
- Air pollution
  - Land and waste management
  - Conservation of water resources
  - Others, please provide your answer in the space below
- 
- 
- 
16. How did your institution primarily conduct environmental education programmes?
- Theoretical teaching (lectures)
  - Conducting workshops
  - Through fieldwork
  - Others, please provide your answer in the space below
- 
- 
- 
17. At the end of the course, were you assessed (through an exam/coursework) on environmental education?
- Yes
  - No
18. In 2015, the United Nations adopted the **Sustainable Development Goals** as a universal call to action to end poverty, protect the planet, and ensure that by 2030 all people enjoy peace and prosperity (UNDP, 2022). Have you ever heard of Sustainable Development Goals?
- Yes
  - No
19. If “Yes”, what do you know?
- 
- 
-



20. If “Yes”, how did you get to hear about Sustainable Development Goals?

- a. Through my teaching training institute
- b. Through individual research
- c. Through television and radio programmes
- d. Others, please provide your answer in the space below

---

---

---

**Note: Based on your experience, is there anything further you would like to add to assist this project?**

**Thank you for you cooperation**
